# Supplementary material for: Synergistic effect of K and Zn on Fe-based catalysts for efficient CO2 hydrogenation
Source: Royal Society of Chemistry journal article supplement (doi:10.1039/d3dt03913g), 2024-01-01
Supplement: d3dt03913g1.pdf [file d3dt03913g1.pdf]

## Electronic supplementary information

# Synergistic Effect of K and Zn on Fe-based Catalysts for Efficient CO<sub>2</sub> Hydrogenation

Jia-Min Lyu,<sup>a</sup> Shen Yu,<sup>\*a</sup> Zhan Liu,<sup>abc</sup> He-You Du,<sup>ab</sup> Min-Hui Sun,<sup>a</sup> Chun-Mu Guo,<sup>a</sup> Yi-Long Wang,<sup>d</sup>  
Yu Li,<sup>a</sup> Li-Hua Chen,<sup>\*a</sup> and Bao-Lian Su<sup>\*ac</sup>

<sup>a</sup> Laboratory of Living Materials at the State Key Laboratory of Advanced Technology for Materials Synthesis and Processing, Wuhan University of Technology, 122 Luoshi Road, Wuhan, 430070, Hubei, China.

<sup>b</sup> International School of Materials Science and Engineering, Wuhan University of Technology, Wuhan, 430070, Hubei, China.

<sup>c</sup> Nanostructure Research Center, Wuhan University of Technology, Wuhan, 430070, Hubei, China.

<sup>d</sup> School of Chemistry, Chemical Engineering and Life Science, Wuhan University of Technology, Wuhan, 430070, Hubei, China.

<sup>e</sup> Laboratory of Inorganic Materials Chemistry, University of Namur, 61 rue de Bruxelles, B-5000 Namur, Belgium.

\* To whom correspondence should be addressed: [ironman@whut.edu.cn](mailto:ironman@whut.edu.cn); [chenlihua@whut.edu.cn](mailto:chenlihua@whut.edu.cn); [bao-lian.su@unamur.be](mailto:bao-lian.su@unamur.be)

## Supplementary Figures and Tables

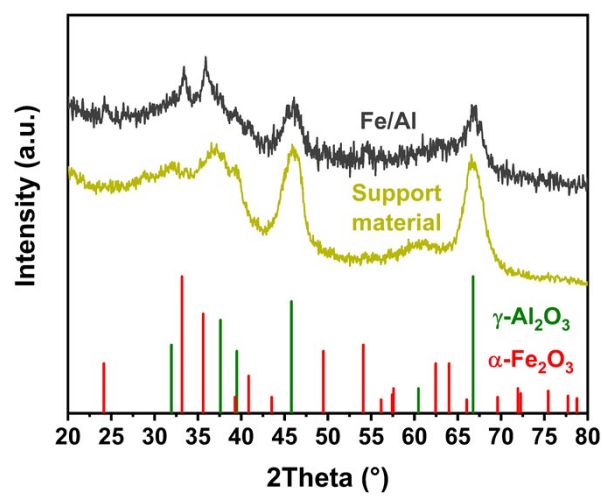

**Fig. S1** XRD patterns of  $\gamma\text{-Al}_2\text{O}_3$  support material and calcined sample Fe/Al.

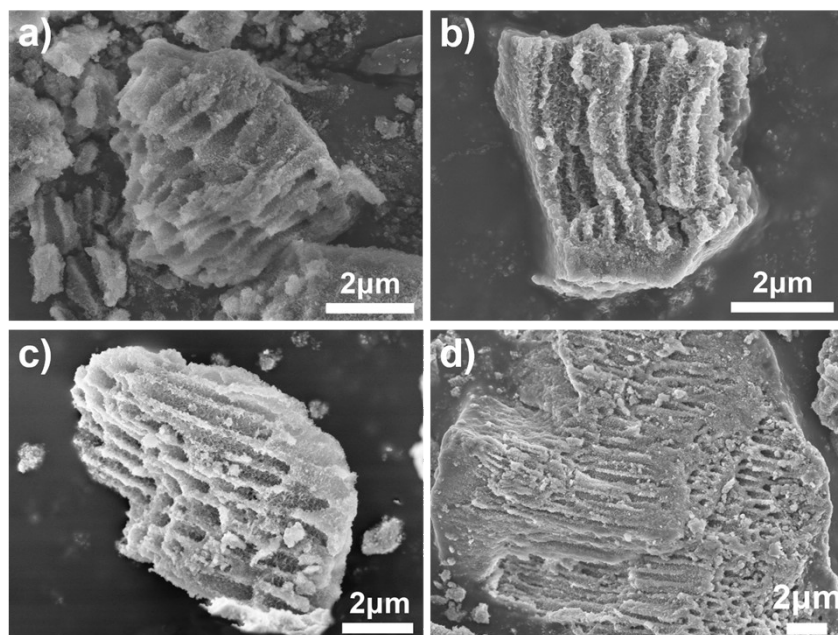

**Fig. S2** SEM images of (a) calcined support  $\gamma$ -Al<sub>2</sub>O<sub>3</sub>, (b) Fe/Al, (c) 10K-Fe/Al, and (d) 10Zn-Fe/Al material.

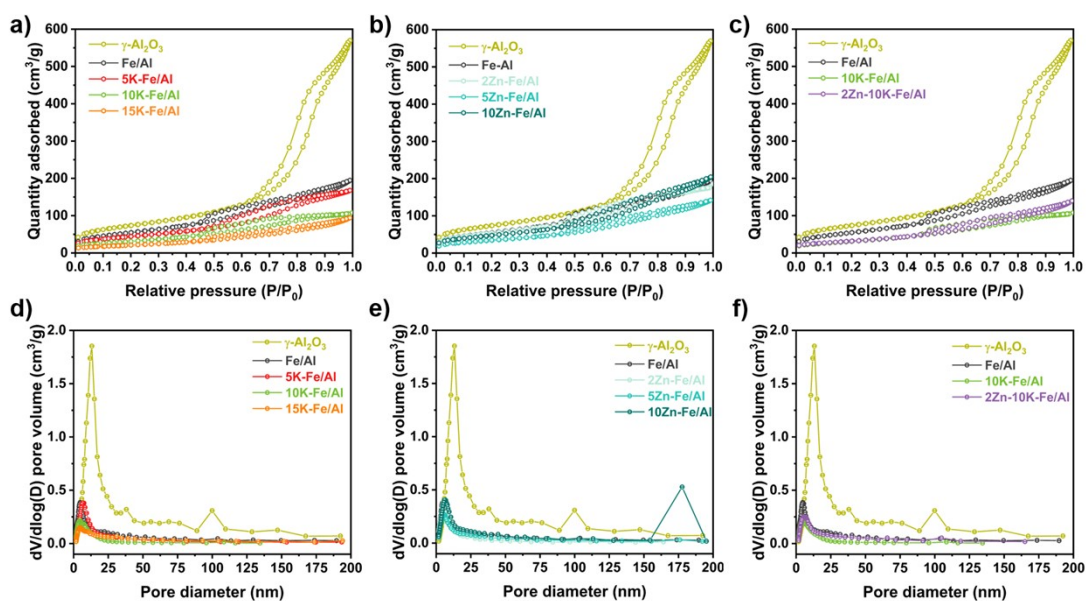

**Fig. S3** (a–c) N<sub>2</sub> adsorption–desorption isotherms and (d–f) pore diameter distribution curves of calcined samples modified with different amounts of K, calcined samples modified with different amounts of Zn, and calcined samples modified with K and Zn.

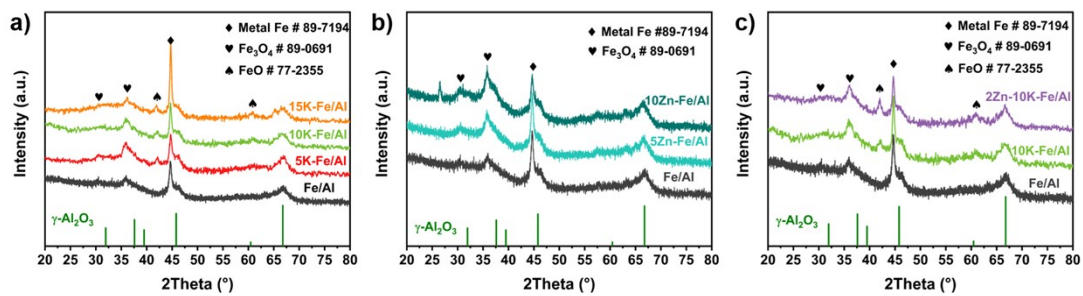

**Fig. S4** XRD patterns of reduced samples modified with (a) different amounts of K, (b) different amounts of Zn, and (c) K and Zn.

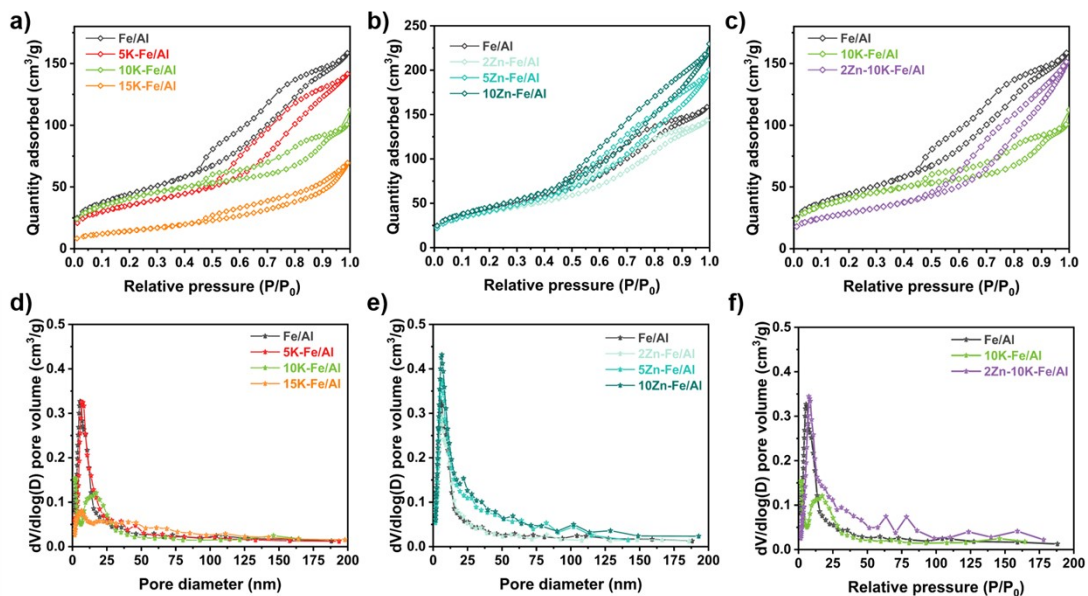

**Fig. S5** (a–c)  $N_2$  adsorption–desorption isotherms and (d–f) pore diameter distribution curves of reduced samples modified with different amounts of K, reduced samples modified with different amounts of Zn, and reduced samples modified with K and Zn.

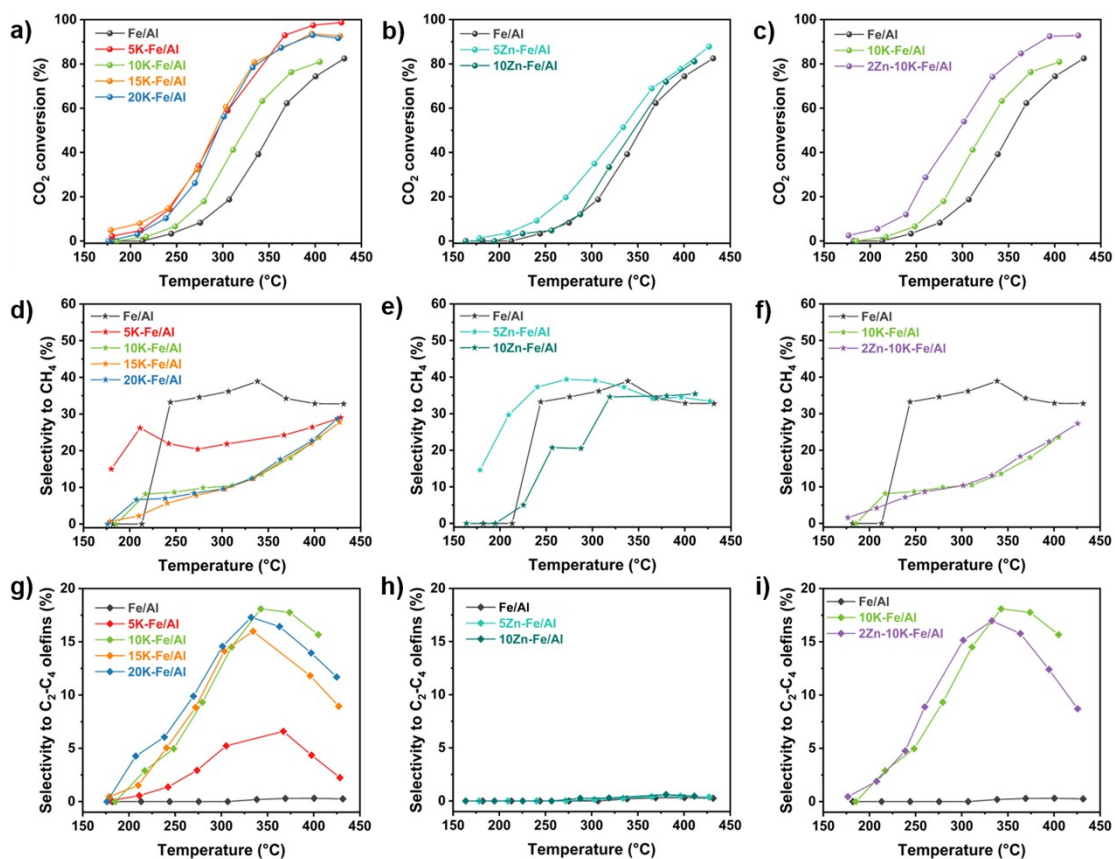

**Fig. S6** (a–c) CO<sub>2</sub> conversion, (d–f) selectivity to CH<sub>4</sub>, (–) selectivity to C<sub>2</sub>–C<sub>4</sub> olefins of catalysts modified with different amounts of K, Zn, or K and Zn as a function of reaction temperature.

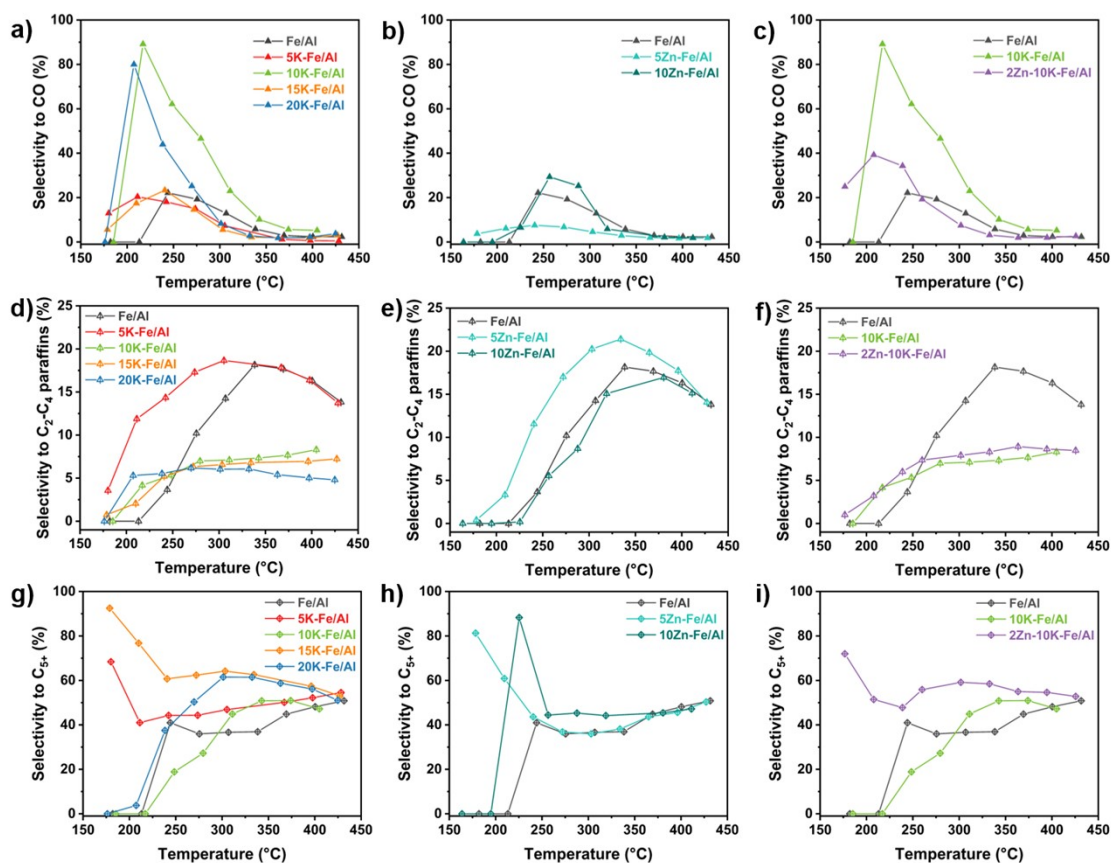

**Fig. S7** Selectivity to (a–c) CO, (d–f) C<sub>2</sub>-C<sub>4</sub> paraffins, (g–h) C<sub>5+</sub> hydrocarbons of catalysts modified with different amounts of K, Zn or K and Zn as a function of reaction temperature.



**Table S1** Textural data from N<sub>2</sub> adsorption-desorption tests.

| As-prepared sample               | S <sub>BET</sub> (m <sup>2</sup> /g) | V <sub>tol</sub> (cm <sup>3</sup> /g) | D <sub>meso</sub> (nm) | Reduced sample | S <sub>BET</sub> (m <sup>2</sup> /g) | V <sub>tol</sub> (cm <sup>3</sup> /g) | D <sub>meso</sub> (nm) |
|----------------------------------|--------------------------------------|---------------------------------------|------------------------|----------------|--------------------------------------|---------------------------------------|------------------------|
| γ-Al <sub>2</sub> O <sub>3</sub> | 261                                  | 0.88                                  | 12.9                   | -              | -                                    | -                                     | -                      |
| Fe/Al                            | 202                                  | 0.29                                  | 4.8                    | Fe/Al          | 160                                  | 0.23                                  | 4.8                    |
| 5K-Fe/Al                         | 159                                  | 0.25                                  | 7.0                    | 5K-Fe/Al       | 123                                  | 0.21                                  | 7.2                    |
| 10K-Fe/Al                        | 117                                  | 0.17                                  | 4.4                    | 10K-Fe/Al      | 142                                  | 0.13                                  | 17.2                   |
| 15K-Fe/Al                        | 78                                   | 0.15                                  | 4.5                    | 15K-Fe/Al      | 54                                   | 0.11                                  | 6.9                    |
| 2Zn-Fe/Al                        | 199                                  | 0.26                                  | 5.1                    | 2Zn-Fe/Al      | 144                                  | 0.21                                  | 6.4                    |
| 5Zn-Fe/Al                        | 126                                  | 0.21                                  | 5.5                    | 5Zn-Fe/Al      | 153                                  | 0.30                                  | 5.9                    |
| 10Zn-Fe/Al                       | 172                                  | 0.31                                  | 6.3                    | 10Zn-Fe/Al     | 171                                  | 0.35                                  | 6.3                    |
| 2Zn-10K-Fe/Al                    | 117                                  | 0.22                                  | 5.9                    | 2Zn-10K-Fe/Al  | 103                                  | 0.23                                  | 7.6                    |

Reduction condition: 0.2 MPa, 450°C for 4 h in pure H<sub>2</sub> with a flow of 25 mL/min

**Table S2** Calculated Metal Fe particle size of samples reduced at 450°C for 4 h by the Debye-Scherrer equation

| Reduced samples           | Fe/Al | 5K-<br>Fe/Al | 10K-<br>Fe/Al | 15K-<br>Fe/Al | 2Zn-<br>Fe/Al | 5Zn-<br>Fe/Al | 10Zn-<br>Fe/Al | 2Zn-10K-<br>Fe/Al |
|---------------------------|-------|--------------|---------------|---------------|---------------|---------------|----------------|-------------------|
| Fe particle diameter (nm) | 18    | 18           | 28            | 35            | 16            | 22            | 23             | 24                |

**Table S3** Catalytic performance of catalysts

| Sample        | conversion      |    | Selectivity     |                                                          |                                                          |                                |                 |
|---------------|-----------------|----|-----------------|----------------------------------------------------------|----------------------------------------------------------|--------------------------------|-----------------|
|               | CO <sub>2</sub> | CO | CH <sub>4</sub> | C <sub>2</sub> <sup>=</sup> -C <sub>4</sub> <sup>=</sup> | C <sub>2</sub> <sup>-</sup> -C <sub>4</sub> <sup>-</sup> | C <sub>2</sub> -C <sub>4</sub> | C <sub>5+</sub> |
| Fe/Al         | 42              | 6  | 39              | 0                                                        | 18                                                       | 18                             | 37              |
| 5K-Fe/Al      | 78              | 4  | 23              | 6                                                        | 18                                                       | 24                             | 49              |
| 10K-Fe/Al     | 63              | 11 | 13              | 18                                                       | 7                                                        | 25                             | 51              |
| 15K-Fe/Al     | 82              | 2  | 13              | 16                                                       | 7                                                        | 23                             | 62              |
| 20K-Fe/Al     | 81              | 3  | 13              | 17                                                       | 6                                                        | 23                             | 61              |
| 5Zn-Fe/Al     | 55              | 3  | 37              | 0                                                        | 21                                                       | 21                             | 39              |
| 10Zn-Fe/Al    | 47              | 5  | 35              | 0                                                        | 16                                                       | 16                             | 44              |
| 2Zn-10K-Fe/Al | 77              | 3  | 14              | 17                                                       | 8                                                        | 25                             | 58              |

Reaction condition: 340°C, 3.0 MPa, and 6360 mL/g/h with reactant gas H<sub>2</sub>/CO<sub>2</sub> = 3/1.
